# Supplementary material for: Pathogenetic Mechanisms Underlying Major Adverse Cardiac Events in Personality Type D Patients after Percutaneous Coronary Intervention: The Roles of Cognitive Appraisal and Coping Strategies
Source: MDPI journal article supplement (doi:10.3390/diagnostics13213374), 2023-11-02
Supplement: s1 [file s1]

Supplement Table S1.

Baseline characteristics of patients excluded and included 1 year after PCI

| Variables                         | Excluded (n = 21) | Included (n = 91) | p     |
|-----------------------------------|-------------------|-------------------|-------|
| Male (n, %)                       | 17(80.95)         | 51(56.1)          | 0.04  |
| Age, years                        | 63.0[52.0;64.0]   | 65.0[59.0;70.0]   | 0.039 |
| BMI, kg/m <sup>2</sup>            | 25.6[23.6;26.9]   | 25.3[21.3;27.7]   | 0.754 |
| Disability (n, %)                 | 7(33.3)           | 27(29.7)          | 0.639 |
| Working (n, %)                    | 8(38.1)           | 35(38.5)          | 0.926 |
| Current smoking (n, %)            | 12(57.1)          | 38(41.7)          | 0.161 |
| Smoking experience, years         | 26.0[11.0;40.0]   | 20.0[10.0;38.0]   | 0.199 |
| Hypertension, n (%)               | 18(85.7)          | 76(83.5)          | 0.237 |
| Diabetes mellitus, n (%)          | 3(14.3)           | 22(24.2)          | 0.414 |
| Stroke (n, %)                     | 2(9.5)            | 8(8.8)            | 0.766 |
| Myocardial infarction (n, %)      | 10(47.6)          | 52(57.1)          | 0.681 |
| Previous CABG (n, %)              | 2(9.5)            | 8(8.8)            | 0.719 |
| Carotid endarterectomy (n, %)     | 1(4.8)            | 1(1.1)            | 0.221 |
| Angina class 0 (n, %)             | 2(9.5)            | 16(17.6)          | 0.439 |
| I (n, %)                          | 2(9.5)            | 9(9.9)            | 0.944 |
| II (n, %)                         | 13(61.9)          | 62(68.1)          | 0.968 |
| III (n, %)                        | 2(9.5)            | 3(3.3)            | 0.173 |
| Heart failure class NYHA 0 (n, %) | 0                 | 7(7.7)            | 0.209 |
| I (n, %)                          | 15(71.4)          | 44(48.4)          | 0.02  |
| II (n, %)                         | 4(19.1)           | 37(40.6)          | 0.101 |
| III (n, %)                        | 0                 | 1(1.1)            | 0.644 |
| <b>Laboratory indicators</b>      |                   |                   |       |
| Total cholesterol, mmol/l         | 4.2[3.5;5.6]      | 4.0[3.5;5.0]      | 0.441 |
| HDL cholesterol, mmol/l           | 1.01[0.93;1.12]   | 1.05[0.85;1.4]    | 0.802 |
| LDL cholesterol, mmol/l           | 2.4[2.1;2.6]      | 2.7[1.8;3.2]      | 0.504 |
| Triglyceride, mmol/l              | 1.3[1.2;1.4]      | 1.3[1.1;1.6]      | 0.759 |
| Creatinine, $\mu$ mol/l           | 87.0[68.0;95.0]   | 90.5[78.5;111.5]  | 0.158 |
| Glucose, mmol/l                   | 5.6[5.3;6.5]      | 6.0[5.3;7.2]      | 0.427 |
| <b>Coronarography</b>             |                   |                   |       |
| 1-coronary artery disease, n (%)  | 11(52.4)          | 66(72.5)          | 0.072 |
| 2-coronary artery disease, n (%)  | 8(38.1)           | 18(19.8)          | 0.073 |
| 3-coronary artery disease, n (%)  | 2(9.5)            | 7(7.7)            | 0.781 |

Data are presented as the median and interquartile range (25 th -75 th percentile) or number [%], as indicated.

Notes: BMI - Body Mass Index, NYHA - New York Heart Association, CABG - coronary artery bypass grafting, HDL - high-density lipoproteins, LDL - low-density lipoproteins.

Supplement Table S2.

Comparative analysis of the initial data of the questionnaire of patients excluded and included 1 year after PCI

| Variables                         | Excluded (n = 21) | Included (n = 91) | p     |
|-----------------------------------|-------------------|-------------------|-------|
| <b>DS-14</b>                      |                   |                   |       |
| negative affectivity, points      | 8.67±4.3          | 10.7±4.6          | 0.11  |
| social inhibition, points         | 9.29±4.2          | 10.1±3.8          | 0.24  |
| <b>HADS</b>                       |                   |                   |       |
| Personal anxiety, points          | 4.43±3.1          | 6.11±3.1          | 0.021 |
| Depression level, points          | 3.9±2.8           | 4.9±3.6           | 0.358 |
| <b>Cognitive appraisal (WCQ)</b>  |                   |                   |       |
| Confrontation, points             | 11.1±4.3          | 10.1±3.6          | 0.167 |
| Distancing, points                | 11.3±3.7          | 10.9±3.5          | 0.701 |
| Self-control, points              | 13.3±4.6          | 12.8±3.7          | 0.297 |
| Search for social support, points | 13.2±4.4          | 11.9±3.9          | 0.102 |
| Taking responsibility, points     | 9.2±2.9           | 8.5±2.6           | 0.111 |
| Avoidance, points                 | 13.9±5.7          | 12.3±4.01         | 0.271 |
| Problem solving planning, points  | 13.7±3.9          | 13.4±3.2          | 0.373 |
| Secondary appraisal, points       | 15.4±5.1          | 13.1±3.9          | 0.01  |

Note: M (SD) = mean (standard deviation).

Supplement Table S3.

Comparative analysis of the questionnaire data "Cognitive assessment of a difficult life situation" in groups of patients with excluded/included

| Variables                                         | Excluded (n = 21) | Included (n = 91) | p     |
|---------------------------------------------------|-------------------|-------------------|-------|
| Common signs of difficult life situations, points | 16.7±5.4          | 15.6±5.0          | 0.426 |
| Lack of control of the situation, points          | 12.3±4.2          | 10.6±4.6          | 0.068 |
| Incomprehensibility of the situation, points      | 13.1±8.4          | 15.4±6.9          | 0.383 |
| The need for a quick, active response, points     | 16.6±3.6          | 16.0±4.8          | 0.830 |
| Difficulties in making a decision, points         | 13.3±4.5          | 14.3±4.9          | 0.206 |
| Difficulties in predicting the situation, points  | 9.3±4.1           | 10.1±4.3          | 0.391 |
| Strong emotions, points                           | 14.3±5.5          | 13.5±5.2          | 0.821 |
| Future perspective, points                        | 12.8±3.9          | 12.5±3.7          | 0.711 |

Supplement Table S4.

Comparative analysis of the questionnaire data "Types of orientations in difficult situations" in groups of patients with excluded/included

| Variables                                   | Excluded (n = 21) | Included (n = 91) | p     |
|---------------------------------------------|-------------------|-------------------|-------|
| Striving for difficulties, points           | 25.2±5.7          | 22.5±5.6          | 0.05  |
| Orientation to high labor intensity, points | 11.3±3.5          | 11.9±2.5          | 0.261 |
| Targeting threat signals, points            | 12.5±3.1          | 12.1±2.9          | 0.553 |
| Focus on opportunities, points              | 19.4±3.7          | 18.2±3.5          | 0.151 |
| Orientation to obstacles, points            | 11.9±4.1          | 12.2±2.9          | 0.811 |
| Loss orientation, points                    | 15.7±4.4          | 16.1±5.1          | 0.939 |
| Resource conservation orientation, points   | 15.3±2.7          | 14.8±4.1          | 0.912 |
| Focus on ignoring difficulties, points      | 12.9±3.5          | 11.5±3.6          | 0.467 |
